# Supplementary material for: Neurological, neuropsychiatric and neurodevelopmental complications of COVID-19
Source: PubMed Central journal article supplement — Aust N Z J Psychiatry. 2020 Oct 1;55(8):750–62. doi: 10.1177/0004867420961472 (PMC8317235; doi:10.1177/0004867420961472), 2020-10-01
Supplement: Supplementary_Material.pdf [file Supplementary_Material.pdf]

## **Supplementary Material**

### **Neurological, neuropsychiatric and neurodevelopmental complications of COVID-19**

Christos Pantelis<sup>1,2,3\*</sup>, Mahesh Jayaram<sup>1,2\*</sup>, Anthony J. Hannan<sup>3</sup>, Robb Wesselingh<sup>4</sup>, Jess Nithianantharajah<sup>3</sup>, Cassandra M. J. Wannan<sup>1</sup>, Warda Taqdees Syeda<sup>1</sup>, K. H. Christopher Choy<sup>3,5</sup>, Daniela Zantomio<sup>6</sup>, Arthur Christopoulos<sup>5</sup>, Dennis Velakoulis<sup>1,7,#</sup>, Terence J. O'Brien<sup>4,8,#</sup>

<sup>1</sup> Melbourne Neuropsychiatry Centre, Department of Psychiatry, University of Melbourne & Melbourne Health, Carlton South, Victoria, Australia

<sup>2</sup> Mid-West Area Mental Health Service, North Western Mental Health, Melbourne Health, St Albans, Victoria, Australia

<sup>3</sup> The Florey Institute of Neuroscience & Mental Health, University of Melbourne, Parkville, Victoria, Australia

<sup>4</sup> Department of Neurology & Neurosciences, The Central Clinical School, Alfred Hospital, Monash University, Melbourne, Victoria, Australia

<sup>5</sup> Monash Institute for Pharmaceutical Sciences, Monash University, Parkville Campus, Parkville, Victoria, Australia

<sup>6</sup> Clinical Haematology, Austin Hospital, Austin Health, Heidelberg, Victoria, Australia

<sup>7</sup> Neuropsychiatry Unit, Royal Melbourne Hospital, Melbourne Health, Victoria, Australia

<sup>8</sup> The Department of Medicine, The Royal Melbourne Hospital, The University of Melbourne, Victoria, Australia

### **References for Table 1**

Abdel-Mannan O, Eyre M, Löbel U, et al. (2020) Neurologic and Radiographic Findings Associated With COVID-19 Infection in Children. *JAMA Neurology*. DOI: 10.1001/jamaneurol.2020.2687.

Alberti P, Beretta S, Piatti M, et al. (2020) Guillain-Barré syndrome related to COVID-19 infection. *Neurology - Neuroimmunology Neuroinflammation*. 1-3.

Alzamora MC, Paredes T, Caceres D, et al. (2020) Severe COVID-19 during Pregnancy and Possible Vertical Transmission. *American Journal of Perinatology*.

Beyrouiti R, Adams ME, Benjamin L, et al. (2020) Characteristics of ischaemic stroke associated with COVID-19. *Journal of Neurology, Neurosurgery & Psychiatry*.

Breslin N, Baptiste C, Miller R, et al. (2020) COVID-19 in pregnancy: early lessons. *American Journal of Obstetrics & Gynecology MFM*. Elsevier Inc., 100111.

- Cebrián J, Gonzalez-Martinez A, García-Blanco MJ, et al. (2020) Headache and impaired consciousness level associated with SARS-CoV-2 in CSF: A case report. *Neurology*. DOI: 10.1212/wnl.0000000000010213. 10.1212/WNL.1000.
- Chen T, Wu D, Chen H, et al. (2020) Clinical characteristics of 113 deceased patients with coronavirus disease 2019: retrospective study. *BMJ*. m1091.
- Chougar L, Shor N, Weiss N, et al. (2020) Retrospective Observational Study of Brain Magnetic Resonance Imaging Findings in Patients with Acute SARS-CoV-2 Infection and Neurological Manifestations. *Radiology*. DOI: 10.1148/radiol.2020202422. 202422.
- Coolen T, Lolli V, Sadeghi N, et al. (2020) Early postmortem brain MRI findings in COVID-19 non-survivors. *Neurology*. DOI: 10.1212/wnl.0000000000010116. 10.1212/WNL.1000.
- Dashraath P, Wong JLJ, Lim MXK, et al. (2020) Coronavirus disease 2019 (COVID-19) pandemic and pregnancy. *American Journal of Obstetrics and Gynecology*. Elsevier Inc.
- Di Mascio D, Khalil A, Saccone G, et al. (2020) Outcome of Coronavirus spectrum infections (SARS, MERS, COVID 1 -19) during pregnancy: a systematic review and meta-analysis. *American Journal of Obstetrics & Gynecology MFM*. Elsevier Inc.
- Dinkin M, Gao V, Mbbs JK, et al. (2020) COVID-19 presenting with ophthalmoparesis from cranial nerve palsy. *Neurology*.
- Dong L, Tian J, He S, et al. (2020) Possible Vertical Transmission of SARS-CoV-2 From an Infected Mother to Her Newborn. *JAMA*. American Medical Association (AMA).
- Eliezer M, Hautefort C, Hamel AL, et al. (2020) Sudden and Complete Olfactory Loss Function as a Possible Symptom of COVID-19. *JAMA Otolaryngol Head Neck Surg*. 2020/04/09 ed.
- Groß R, Conzelmann C, Müller JA, et al. (2020) Detection of SARS-CoV-2 in human breastmilk. *The Lancet* 395(10239): 1757-1758.
- Gutiérrez-Ortiz C, Méndez A, Rodrigo-Rey S, et al. (2020) Miller Fisher Syndrome and polyneuritis cranialis in COVID-19. *Neurology*.
- Helms J, Kremer S, Merdji H, et al. (2020) Neurologic Features in Severe SARS-CoV-2 Infection. *N Engl J Med*. 2020/04/16 ed.
- Kanberg N, Ashton NJ, Andersson L-M, et al. (2020) Neurochemical evidence of astrocytic and neuronal injury commonly found in COVID-19. *Neurology*. DOI: 10.1212/WNL.0000000000010111. 10.1212/WNL.0000000000010111.
- Karimi-Zarchi M, Neamatzadeh H, Dastgheib SA, et al. (2020) Vertical Transmission of Coronavirus Disease 19 (COVID-19) from Infected Pregnant Mothers to Neonates: A Review. *Fetal and pediatric pathology*. Taylor & Francis.
- Kirtsman M, Diambomba Y, Poutanen SM, et al. (2020) Probable congenital SARS-CoV-2 infection in a neonate born to a woman with active SARS-CoV-2 infection. *Canadian Medical Association Journal* 192(24): E647-E650.
- Kremer S, Lersy F, Anheim M, et al. (2020) Neurologic and neuroimaging findings in COVID-19 patients: A retrospective multicenter study. *Neurology*. DOI: 10.1212/wnl.0000000000010112. 10.1212/WNL.1000.
- Lechien JR, Chiesa-Estomba CM, De Siati DR, et al. (2020) Olfactory and gustatory dysfunctions as a clinical presentation of mild-to-moderate forms of the coronavirus disease (COVID-19): a multicenter European study. *European Archives of Oto-Rhino-Laryngology*. Springer Berlin Heidelberg.
- Li D, Jin M, Bao P, et al. (2020) Clinical Characteristics and Results of Semen Tests Among Men With Coronavirus Disease 2019. 2019-2021.

- Luers JC, Rokohl AC, Loreck N, et al. (2020) Olfactory and Gustatory Dysfunction in Coronavirus Disease 19 (COVID-19). *Clinical Infectious Diseases*.
- Mao L, Jin H, Wang M, et al. (2020) Neurologic Manifestations of Hospitalized Patients With Coronavirus Disease 2019 in Wuhan, China. *JAMA Neurology*. American Medical Association (AMA).
- Merkler AE, Parikh NS, Mir S, et al. (2020) Risk of Ischemic Stroke in Patients With Coronavirus Disease 2019 (COVID-19) vs Patients With Influenza. *JAMA Neurology*. DOI: 10.1001/jamaneurol.2020.2730.
- Moriguchi T, Harii N, Goto J, et al. (2020) A first Case of Meningitis/Encephalitis associated with SARS-Coronavirus-2. *International journal of infectious diseases : IJID : official publication of the International Society for Infectious Diseases*. International Society for Infectious Diseases.
- Nathan N, Prevost B and Corvol H (2020) Atypical presentation of COVID-19 in young infants. *The Lancet*. Elsevier Ltd.
- Oxley TJ, Mocco J, Shahram M, et al. (2020) Large-Vessel Stroke as a Presenting Feature of Covid-19 in the Young. *New England Journal of Medicine*.
- Patanè L, Morotti D, Giunta MR, et al. (2020) Vertical transmission of coronavirus disease 2019: severe acute respiratory syndrome coronavirus 2 RNA on the fetal side of the placenta in pregnancies with coronavirus disease 2019–positive mothers and neonates at birth. *American Journal of Obstetrics & Gynecology MFM*. DOI: 10.1016/j.ajogmf.2020.100145. 100145.
- Paterson RW, Brown RL, Benjamin L, et al. (2020) The emerging spectrum of COVID-19 neurology: clinical, radiological and laboratory findings. *Brain*. DOI: 10.1093/brain/awaa240.
- Peng Z, Wang J, Mo Y, et al. (2020) Unlikely SARS-CoV-2 vertical transmission from mother to child: A case report. *Journal of Infection and Public Health*. King Saud Bin Abdulaziz University for Health Sciences, 818-820.
- Poyiadji N, Shahin G, Noujaim D, et al. (2020) COVID-19–associated Acute Hemorrhagic Necrotizing Encephalopathy: CT and MRI Features. *Radiology*.
- Schwartz DA (2020) An Analysis of 38 Pregnant Women with COVID-19, Their Newborn Infants, and Maternal-Fetal Transmission of SARS-CoV-2: Maternal Coronavirus Infections and Pregnancy Outcomes. *Archives of pathology & laboratory medicine*.
- Solomon IH, Normandin E, Bhattacharyya S, et al. (2020) Neuropathological Features of Covid-19. *New England Journal of Medicine*. DOI: 10.1056/NEJMc2019373.
- Spinato G, Fabbris C, Polesel J, et al. (2020) Self-reported olfactory and taste disorders in SARS-CoV-2 patients: a cross-sectional study. *JAMA*. 1-2.
- Toscano F, Palmerini F, Ravaglia S, et al. (2020) Guillain-Barre syndrome associated with SARS-CoV-2. *New England Journal of Medicine*.
- Varatharaj A, Thomas N, Ellul MA, et al. (2020) Neurological and neuropsychiatric complications of COVID-19 in 153 patients: a UK-wide surveillance study. *The Lancet Psychiatry*. DOI: 10.1016/s2215-0366(20)30287-x.
- Vivanti AJ, Vauloup-Fellous C, Prevot S, et al. (2020) Transplacental transmission of SARS-CoV-2 infection. *Nature Communications* 11(1).
- von Weyhern CH, Kaufmann I, Neff F, et al. (2020) Early evidence of pronounced brain involvement in fatal COVID-19 outcomes. *Lancet* 395(10241): e109.
- Zamaniyan M, Ebadi A, Aghajanoor Mir S, et al. (2020) Preterm delivery in pregnant woman with critical COVID -19 pneumonia and vertical transmission *Prenatal Diagnosis*.

- Zambreanu L, Lightbody S, Bhandari M, et al. (2020) A case of limbic encephalitis associated with asymptomatic COVID-19 infection. *Journal of Neurology, Neurosurgery & Psychiatry*. DOI: 10.1136/jnnp-2020-323839. jnnp-2020-32383.
- Zeng H, Xu C, Fan J, et al. (2020) Antibodies in Infants Born to Mothers With COVID-19 Pneumonia. *JAMA*. E1-E2.
- Zhu H, Wang L, Fang C, et al. (2020) Clinical analysis of 10 neonates born to mothers with 2019-nCoV pneumonia. *Translational Pediatrics*. 51-60.
